# Supplementary material for: UVA-induced DNA double-strand breaks result from the repair of clustered oxidative DNA damages
Source: PubMed Central journal article supplement — Nucleic Acids Res. 2012 Aug 30;40(20):10263–73. doi: 10.1093/nar/gks824 (PMC3488256; doi:10.1093/nar/gks824), 2012-08-30
Supplement: supp_gks824_nar-00625-d-2012-File006.pdf [file supp_gks824_nar-00625-d-2012-File006.pdf]

## Supplementary Information S1

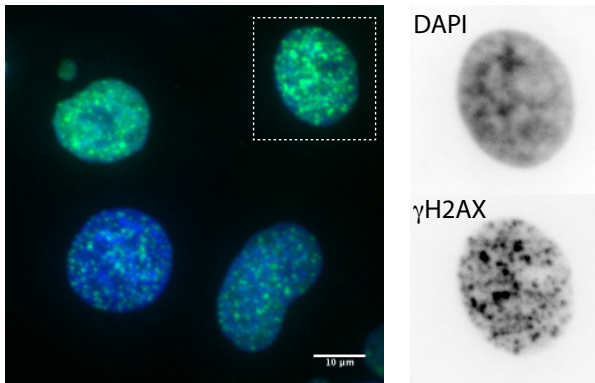

S1: Control of the  $\gamma$ H2AX immuno assay. Cells were exposed to 1 Gy X-rax and subjected to the same staining protocol as in figure 1.

## Supplementary Information S2

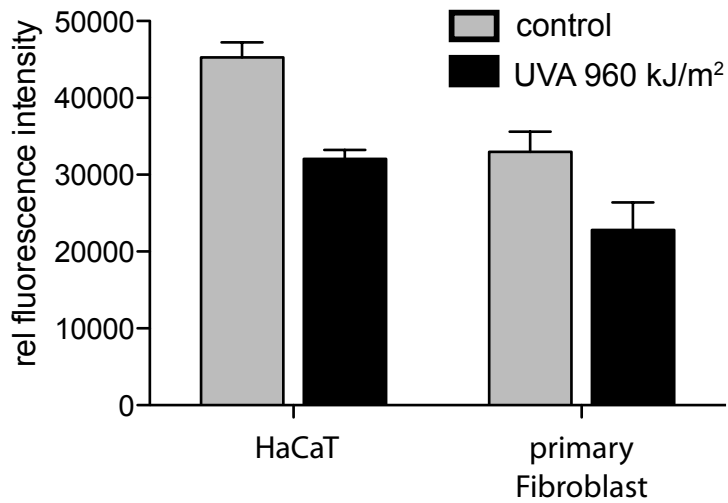

S2: Glutathione level in unirradiated and UVA exposed cells.  $5 \times 10^6$  cells were lysed and assayed with the ApoAlert Glutathione assay kit (Clontech) according to the manufacturer. Fluorescence intensity of monochlorobimane was measured in a Victor plate reader (Perkin Elmer) with excitation at 355 nm and emission 460 nm longpath. Fluorescence readings were normalized to the total protein amount in the sample.

### Supplementary Information S3

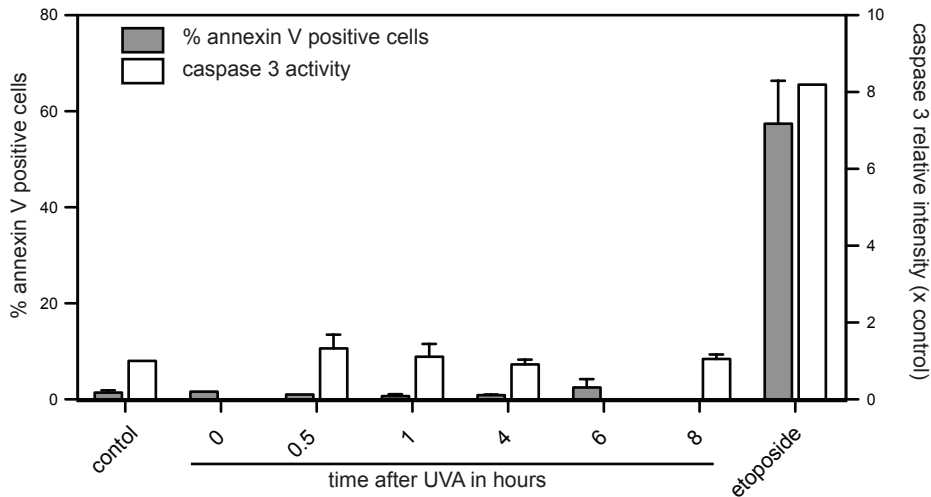

S3: Apoptosis detected in HaCaT cells exposed to 900 kJ/m<sup>2</sup> UVA and postincubated in normal growth medium for the indicated time. The number of apoptotic cells was determined either by annexin V staining followed by fluorescence microscopy or by the measuring the Caspase 3 activity using the the caspase 3 colorimetric kit from R&D Systems. UVA expose does not induce significant levels of apoptosis in the first 8 hours post irradiation and thus should not influence the dsb detection as discussed in the main text.
